# Supplementary material for: Epidemiology and Comparative Analyses of the S Gene on Feline Coronavirus in Central China
Source: MDPI journal article supplement (doi:10.3390/pathogens11040460), 2022-04-12
Supplement: s1 [file s1]

**Table S1 Information related to sequences in the gene bank**

| No. | Strain name                     | Collection node | Living environment    | Breed | Gender | Age | Sample source | Detection of FCoV based on 3'UTR gene | Genotyping of FCoVs based on partial S gene<br>Type I of FCoV<br>Type II of FCoV | Genbank accession No. of partial S genes of FCoVs |
|-----|---------------------------------|-----------------|-----------------------|-------|--------|-----|---------------|---------------------------------------|----------------------------------------------------------------------------------|---------------------------------------------------|
| 1   | FIPV/HB/WH/2020/74/f2           | Oct-20          | /                     |       |        |     | ascites       | +                                     | +                                                                                | OK236259                                          |
| 2   | FCoV/HB/WH/2019/10/Zhuangzhuang | Nov-19          | Multi-cat environment | BSH   | M      | 12M | feces         | +                                     | +                                                                                | OK236260                                          |
| 3   | FCoV/HB/WH/2019/12/Xiaosongshu  | Nov-19          | Multi-cat environment | DSH   | M      | 24M | feces         | +                                     | +                                                                                | OK236261                                          |
| 4   | FCoV/HB/WH/2019/15/Qinqin       | Nov-19          | Multi-cat environment | DSH   | M      | 24M | feces         | +                                     | +                                                                                | OK236262                                          |
| 5   | FCoV/HB/WH/2019/16/Yuanliuliu   | Nov-19          | Multi-cat environment | DSH   | M      | 8M  | feces         | +                                     | +                                                                                | OK236263                                          |
| 6   | FCoV/HB/WH/2019/17/Xiaoxiao     | May-19          | Multi-cat environment | DSH   | M      | 24M | feces         | +                                     | +                                                                                | OK236264                                          |
| 7   | FCoV/HB/WH/2019/19/Doudou       | Oct-19          | Multi-cat environment | DSH   | M      | 8M  | feces         | +                                     | +                                                                                | OK236265                                          |
| 8   | FCoV/HB/WH/2019/2/Ali           | Mar-19          | Multi-cat environment | DSH   | F      | 36M | feces         | +                                     | +                                                                                | OK236266                                          |
| 9   | FCoV/HB/WH/2019/20/Huli         | Apr-19          | Multi-cat environment | DSH   | F      | 24M | feces         | +                                     | +                                                                                | OK236267                                          |
| 10  | FCoV/HB/WH/2019/24/Wawa         | May-19          | Multi-cat environment | BSH   | F      | 10M | feces         | +                                     | +                                                                                | OK236268                                          |
| 11  | FCoV/HB/WH/2019/31/Aobai        | May-19          | Single cat household  | ELH   | F      | 7M  | feces         | +                                     | +                                                                                | OK236269                                          |
| 12  | FCoV/HB/WH/2019/33/Erhao        | Jun-19          | Multi-cat environment | ESH   | M      | 3M  | feces         | +                                     | +                                                                                | OK236270                                          |
| 13  | FCoV/HB/WH/2019/34/Sanhao       | Jun-19          | Multi-cat environment | ESH   | F      | 3M  | feces         | +                                     | +                                                                                | OK236271                                          |
| 14  | FCoV/HB/WH/2019/38/Xiaoliu      | Jul-19          | Multi-cat environment | BSH   | F      | 10M | feces         | +                                     | +                                                                                | OK236272                                          |
| 15  | FCoV/HB/WH/2019/4/Lugouqiao     | Mar-19          | Multi-cat environment | DSH   | F      | 24M | feces         | +                                     | +                                                                                | OK236273                                          |

|    |                                  |        |                       |     |   |     |       |   |   |          |
|----|----------------------------------|--------|-----------------------|-----|---|-----|-------|---|---|----------|
| 16 | FCoV/HB/WH/2019/43/Miantuan      | Jul-19 | Multi-cat environment | DSH | M | 60M | feces | + | + | OK236274 |
| 17 | FCoV/HB/WH/2019/5/Jianjian       | Mar-19 | Multi-cat environment | DSH | F | 36M | feces | + | + | OK236275 |
| 18 | FCoV/HB/WH/2019/50/Dahong        | Jul-19 | Multi-cat environment | BSH | F | 33M | feces | + | + | OK236276 |
| 19 | FCoV/HB/WH/2019/51/Meimei        | Jun-19 | Multi-cat environment | BSH | F | 33M | feces | + | + | OK236277 |
| 20 | FCoV/HB/WH/2019/52/Momo          | Jul-19 | Multi-cat environment | BSH | F | 3M  | feces | + | + | OK236278 |
| 21 | FCoV/HB/WH/2019/53/Danxiaogui    | Aug-19 | Multi-cat environment | BSH | M | 8M  | feces | + | + | OK236279 |
| 22 | FCoV/HB/WH/2019/54/Dada          | Aug-19 | Multi-cat environment | BSH | M | 8M  | feces | + | + | OK236280 |
| 23 | FCoV/HB/WH/2019/55/Pangpang      | Sep-19 | Multi-cat environment | BSH | M | 7M  | feces | + | + | OK236281 |
| 24 | FCoV/HB/WH/2019/56/Taotao        | Sep-19 | Multi-cat environment | BSH | F | 7M  | feces | + | + | OK236282 |
| 25 | FCoV/HB/WH/2019/57/Zhuangzhuang2 | Sep-19 | Multi-cat environment | BSH | F | 7M  | feces | + | + | OK236283 |
| 26 | FCoV/HB/WH/2019/58/Wawa2         | Oct-19 | Multi-cat environment | BSH | F | 7M  | feces | + | + | OK236284 |
| 27 | FCoV/HB/WH/2019/59/Hei           | Oct-19 | Multi-cat environment | DSH | M | 6M  | feces | + | + | OK236285 |
| 28 | FCoV/HB/WH/2019/6/Xiaohong       | Mar-19 | Multi-cat environment | BSH | F | 10M | feces | + | + | OK236286 |
| 29 | FCoV/HB/WH/2019/64/Dazhuang      | Nov-19 | Multi-cat environment | BSH | M | 24M | feces | + | + | OK236287 |
| 30 | FCoV/HB/WH/2019/66/Shan          | Nov-19 | Multi-cat environment | ESH | F | 24M | feces | + | + | OK236288 |
| 31 | FCoV/HB/WH/2019/7/Lvyan          | Apr-19 | Multi-cat environment | DSH | M | 24M | feces | + | + | OK236289 |
| 32 | FCoV/HB/WH/2019/8/Xiaohui        | Apr-19 | Multi-cat environment | BSH | M | 10M | feces | + | + | OK236290 |

|    |                            |        |                       |     |   |     |         |   |   |          |
|----|----------------------------|--------|-----------------------|-----|---|-----|---------|---|---|----------|
| 33 | FIPV/HB/WH/2019/1/Chami    | Mar-19 | /                     | ELH | M | 7M  | ascites | + | + | OK236291 |
| 34 | FIPV/HB/WH/2019/11/Runtu   | Mar-19 | Multi-cat environment | BSH | M | 6M  | ascites | + | + | OK236292 |
| 35 | FIPV/HB/WH/2019/15/Latiao  | May-19 | Multi-cat environment | BSH | M | 7M  | ascites | + | + | OK236293 |
| 36 | FIPV/HB/WH/2019/16/Baozi   | May-19 | Multi-cat environment | BSH | F | 4M  | ascites | + | + | OK236294 |
| 37 | FIPV/HB/WH/2019/18/Jiujiu  | May-19 | Single cat household  | BSH | F | 3M  | ascites | + | + | OK236295 |
| 38 | FIPV/HB/WH/2019/20/Shiqi   | May-19 | Single cat household  | ESH | M | 6M  | ascites | + | + | OK236296 |
| 39 | FIPV/HB/WH/2019/21/Zhanan  | Jun-19 | Single cat household  | BSH | M | 9M  | ascites | + | + | OK236297 |
| 40 | FIPV/HB/WH/2019/25/Heiya   | Sep-19 | /                     | DSH | F | 4M  | ascites | + | + | OK236298 |
| 41 | FIPV/HB/WH/2019/28/Kele    | Nov-19 | Single cat household  | ASH | M | 7M  | ascites | + | + | OK236299 |
| 42 | FIPV/HB/WH/2019/3/Maodou   | Feb-19 | Multi-cat environment | ESH | M | 8M  | ascites | + | + | OK236300 |
| 43 | FIPV/HB/WH/2019/38/Wanwan  | Dec-19 | /                     | BSH | F | 6M  | ascites | + | + | OK236301 |
| 44 | FIPV/HB/WH/2019/41/Nini    | Aug-19 | Single cat household  | BSH | M | 5M  | ascites | + | + | OK236302 |
| 45 | FIPV/HB/WH/2019/47/Luna    | Dec-19 | Multi-cat environment | DSH | F | 18M | ascites | + | + | OK236303 |
| 46 | FIPV/HB/WH/2019/48/Wubai   | Dec-19 | Multi-cat environment | BSH | F | 4M  | ascites | + | + | OK236304 |
| 47 | FIPV/HB/WH/2019/8/Hanhan   | Dec-19 | /                     | ELH | F | 14M | ascites | + | + | OK236305 |
| 48 | FCoV/HB/WH/2020/107/Wanzi  | Sep-20 | Single cat household  | DSH | F | 5M  | feces   | + | + | OK236306 |
| 49 | FCoV/HB/WH/2020/108/107    | Sep-20 | Single cat household  | DSH | F | 5M  | feces   | + | + | OK236307 |
| 50 | FCoV/HB/WH/2020/126/Nomi   | Oct-20 | Single cat household  | BSH | M | 12M | feces   | + | + | OK236308 |
| 51 | FCoV/HB/WH/2020/134/Naiqiu | Oct-20 | Single cat household  | ELH | M | 5M  | feces   | + | + | OK236309 |

|    |                              |        |                       |     |   |     |       |   |   |          |
|----|------------------------------|--------|-----------------------|-----|---|-----|-------|---|---|----------|
| 52 | FCoV/HB/WH/2020/136/Babao    | Oct-20 | Single cat household  | ESH | M | 12M | feces | + | + | OK236310 |
| 53 | FCoV/HB/WH/2020/141/Tiantian | Oct-20 | Single cat household  | BSH | F | 2M  | feces | + | + | OK236311 |
| 54 | FCoV/HB/WH/2020/143/youzi    | Oct-20 | Single cat household  | ELH | F | 3M  | feces | + | + | OK236312 |
| 55 | FCoV/HB/WH/2020/145/Rourou   | Oct-20 | Single cat household  | BSH | F | 29M | feces | + | + | OK236313 |
| 56 | FCoV/HB/WH/2020/147/Libai    | Oct-20 | Single cat household  | ESH | M | 48M | feces | + | + | OK236314 |
| 57 | FCoV/HB/WH/2020/149/Huasheng | Oct-20 | Single cat household  | BSH | F | 16M | feces | + | + | OK236315 |
| 58 | FCoV/HB/WH/2020/151/Anni     | Nov-20 | Single cat household  | ESH | F | 36M | feces | + | + | OK236316 |
| 59 | FCoV/HB/WH/2020/153/Dali     | Nov-20 | Multi-cat environment | BSH | M | 2M  | feces | + | + | OK236317 |
| 60 | FCoV/HB/WH/2020/154/Sifeng   | Nov-20 | Single cat household  | /   | M | 3M  | feces | + | + | OK236318 |
| 61 | FCoV/HB/WH/2020/156/Dagou    | Nov-20 | Single cat household  | BSH | M | 6M  | feces | + | + | OK236319 |
| 62 | FCoV/HB/WH/2020/164/Paofu    | Nov-20 | Single cat household  | ELH | F | 4M  | feces | + | + | OK236320 |
| 63 | FCoV/HB/WH/2020/188/Chuchu   | Dec-20 | Single cat household  | DSH | M | 3M  | feces | + | + | OK236321 |
| 64 | FCoV/HB/WH/2020/193/Mengmeng | Sep-20 | Multi-cat environment | DSH | F | 2M  | feces | + | + | OK236322 |
| 65 | FCoV/HB/WH/2020/195/Susu     | Sep-20 | Multi-cat environment | ESH | F | 16M | feces | + | + | OK236323 |
| 66 | FCoV/HB/WH/2020/198/lucky    | Sep-20 | Multi-cat environment | ESH | M | 12M | feces | + | + | OK236324 |
| 67 | FCoV/HB/WH/2020/200/Kafei    | Sep-20 | Multi-cat environment | ESH | M | 32M | feces | + | + | OK236325 |
| 68 | FCoV/HB/WH/2020/201/kaka     | Sep-20 | Multi-cat environment | ESH | M | 28M | feces | + | + | OK236326 |

|    |                                |        |                       |     |   |     |         |   |   |          |
|----|--------------------------------|--------|-----------------------|-----|---|-----|---------|---|---|----------|
| 69 | FCoV/HB/WH/2020/205/Xiangxiang | Sep-20 | Multi-cat environment | ESH | F | 12M | feces   | + | + | OK236327 |
| 70 | FCoV/HB/WH/2020/206/xueshang   | Sep-20 | Multi-cat environment | ESH | M | 28M | feces   | + | + | OK236328 |
| 71 | FCoV/HB/WH/2020/212/Niangao    | Sep-20 | Multi-cat environment |     |   |     | feces   | + | + | OK236329 |
| 72 | FCoV/HB/WH/2020/224/Mimi       | Nov-20 | Multi-cat environment | ESH | F | 7M  | feces   | + | + | OK236330 |
| 73 | FCoV/HB/WH/2020/226/qiuqiu     | Dec-20 | Single cat household  |     | M | 3M  | feces   | + | + | OK236331 |
| 74 | FCoV/HB/WH/2020/230/changshou  | Sep-20 | Single cat household  | ELH | F | 4W  | feces   | + | + | OK236332 |
| 75 | FCoV/HB/WH/2020/232/Baixiaobai | Sep-20 | Single cat household  | DSH | M | 3M  | feces   | + | + | OK236333 |
| 76 | FCoV/HB/WH/2020/235/Fugui      | Oct-20 | Single cat household  | DSH | F | 7M  | feces   | + | + | OK236334 |
| 77 | FCoV/HB/WH/2020/238/Tuanzi     | Nov-20 | Single cat household  | BSH | M | 6M  | feces   | + | + | OK236335 |
| 78 | FCoV/HB/WH/2020/242/Doubao     | Jan-20 | Single cat household  | ESH | F | 4M  | feces   | + | + | OK236336 |
| 79 | FCoV/HB/WH/2020/249/Daliu      | Dec-20 | Multi-cat environment | DSH |   |     | feces   | + | + | OK236337 |
| 80 | FCoV/HB/WH/2020/250/Juzi       | Dec-20 | /                     | DSH | M | 24M | feces   | + | + | OK236338 |
| 81 | FCoV/HB/WH/2020/77/16          | Aug-20 | /                     | ESH | M | 8M  | feces   | + | + | OK236339 |
| 82 | FCoV/HB/WH/2020/78/18          | Aug-20 | /                     | ELH | M | 9M  | feces   | + | + | OK236340 |
| 83 | FCoV/HB/WH/2020/82/28          | Dec-20 | /                     |     |   |     | feces   | + | + | OK236341 |
| 84 | FIPV/HB/WH/2020/51/huahua      | Dec-20 | Single cat household  | ASH | M | 17M | ascites | + | + | OK236342 |
| 85 | FIPV/HB/WH/2020/73/Xiaoba      | Oct-20 | /                     |     |   |     | ascites | + | + | OK236343 |

**Notes:** For breed, ASH: American Shorthair; BSH: British Shorthair; DSH: Domestic Shorthair; ESH: Exotic Shorthair; ELH: Exotic Longhair. For gender, F: female, and M: male. For age, M: month. NA: not available. For sample source, CHC: clinically healthy cat; FSC: FIP-suspected cat. “+” represents positive results of viral detection; “-” represents negative results of viral detection

Table S2 Correlation of FCoV prevalence with clinical status, sex, breed, age and residential density

|                            | Total<br>number of<br>samples | FCoV positive<br>number | Positive rate | FCoV negative<br>number | Negative<br>rate | $\chi^2$ | P     | OR    | 95%CI       |
|----------------------------|-------------------------------|-------------------------|---------------|-------------------------|------------------|----------|-------|-------|-------------|
|                            | 371                           | 172                     | 46.4%         | 199                     | 53.6%            |          |       |       |             |
| <b>Clinical status</b>     | n=371                         |                         |               |                         |                  | 6.932    | 0.008 |       |             |
| FIP suspected cat          | 81                            | 48                      | 59.3%         | 33                      | 40.7%            |          |       | 1.683 | 1.135-2.494 |
| Non-FIP cat                | 290                           | 124                     | 42.8%         | 166                     | 57.2%            |          |       | 0.864 | 0.773-0.966 |
| <b>Gender</b>              | n=358                         |                         |               |                         |                  | 0.634    | 0.426 |       |             |
| male                       | 186                           | 90                      | 48.4%         | 96                      | 51.6%            |          |       | 1.084 | 0.889-1.323 |
| female                     | 172                           | 76                      | 44.2%         | 96                      | 55.8%            |          |       | 0.916 | 0.736-1.138 |
| <b>Variety</b>             | n=351                         |                         |               |                         |                  | 7.901    | 0.005 |       |             |
| Mongrel cat                | 127                           | 46                      | 36.2%         | 81                      | 63.8%            |          |       | 0.663 | 0.493-0.890 |
| Purebred cat               | 224                           | 116                     | 51.8%         | 108                     | 48.2%            |          |       | 1.253 | 1.071-1.466 |
| <b>Age</b>                 | n=361                         |                         |               |                         |                  | 5.953    | 0.015 |       |             |
| ≤10M                       | 211                           | 109                     | 51.7%         | 102                     | 48.3%            |          |       | 1.241 | 1.044-1.477 |
| A>10M                      | 150                           | 58                      | 38.7%         | 92                      | 61.3%            |          |       | 0.732 | 0.567-0.945 |
| <b>Residential density</b> | n=323                         |                         |               |                         |                  | 12.613   | 0.000 |       |             |
| Single                     | 218                           | 81                      | 37.2%         | 137                     | 62.8%            |          |       | 0.754 | 0.639-0.889 |
| Multiple                   | 105                           | 61                      | 58.1%         | 44                      | 41.9%            |          |       | 1.767 | 1.284-2.432 |

In the process of collecting clinical information, some pet owners did not disclose some pet-related information, resulting in a different total sample volume when analyzing each risk factor.

$\chi^2$ : Chi-square; OR: Odds Ratio; C: Confidence Interval; M: Months.

Table S3 The relationship between FCoV and diarrhea in Non-FIP cat

| Symptom      | Total number of sample | FCoV positive | FCoV negative | $\chi^2$ | $p$   | OR    | 95%CI       |
|--------------|------------------------|---------------|---------------|----------|-------|-------|-------------|
|              | n=290                  |               |               | 0.395    | 0.530 |       |             |
| Diarrhea     | 116                    | 53 (42.1%)    | 63 (38.4%)    |          |       | 1.095 | 0.826-1.452 |
| Non-diarrhea | 174                    | 73 (57.9%)    | 101 (61.6%)   |          |       | 0.941 | 0.777-1.140 |

**Table S4 The reference sequence involved and its related information**

| NCBI No.   | Country | Collection time | Where the reference sequence is used in the text |               |                | Virus      |
|------------|---------|-----------------|--------------------------------------------------|---------------|----------------|------------|
| NC045512.2 | China   | 2019            | /                                                | Phylogenetics | /              | 2019-nCoV  |
| NC004718   | Canada  | 2003            | /                                                | Phylogenetics | /              | SARS-CoV   |
| MZ724506.1 | India   | 2021            | /                                                | Phylogenetics | /              | SARS-CoV-2 |
| KC164505.2 | UK      | 2012            | /                                                | Phylogenetics | /              | MERS-CoV   |
| KP981644   | Italy   | 2005            | /                                                | Phylogenetics | /              | CCoV       |
| NC038861   | USA     | 2000            | /                                                | Phylogenetics | /              | TEGV       |
| NC002306.3 | USA     | 2005            | Mutation                                         | Phylogenetics | /              | FIPV       |
| MW030110.1 | USA     | 2002            | Mutation                                         | Phylogenetics | Furin cleavage | FCoV       |
| MW030109.1 | USA     | 2018            | Mutation                                         | /             | /              | FIPV       |
| MW030108.1 | China   | 2021            | Mutation                                         | Phylogenetics | Furin cleavage | FCoV       |
| MT444152.1 | China   | 2019            | Mutation                                         | Phylogenetics | Furin cleavage | FIPV       |
| MT239440.1 | China   | 2017            | Mutation                                         | Phylogenetics | /              | FCoV       |
| MT239439.1 | China   | 2016            | Mutation                                         | Phylogenetics | Furin cleavage | FCoV       |
| MN165107.1 | China   | 2018            | Mutation                                         | Phylogenetics | Furin cleavage | FCoV       |
| MG893511.1 | Germany | 2012            | Mutation                                         | Phylogenetics | Furin cleavage | FIPV       |
| KY566211.1 | China   | 2016            | Mutation                                         | Phylogenetics | Furin cleavage | FIPV       |
| KY566210.1 | China   | 2016            | Mutation                                         | Phylogenetics | Furin cleavage | FIPV       |
| KY566209.1 | China   | 2016            | Mutation                                         | Phylogenetics | Furin cleavage | FIPV       |
| KY292377.1 | China   | 2016            | Mutation                                         | Phylogenetics | Furin cleavage | FIPV       |
| KX722530.1 | Denmark | 2015            | Mutation                                         | Phylogenetics | Furin cleavage | FIPV       |
| KX722529.1 | Belgium | 2015            | Mutation                                         | Phylogenetics | Furin cleavage | FCoV       |
| KU215419.1 | Belgium | 2013            | Mutation                                         | Phylogenetics | Furin cleavage | FIPV       |
| KP143512.1 | UK      | 2013            | Mutation                                         | Phylogenetics | Furin cleavage | FIPV       |
| KP143511.1 | UK      | 2013            | Mutation                                         | /             | Furin cleavage | FCoV       |
| KP143510.1 | UK      | 2013            | Mutation                                         | /             | Furin cleavage | FCoV       |
| KP143509.1 | UK      | 2013            | Mutation                                         | /             | Furin cleavage | FCoV       |
| KP143508.1 | UK      | 2013            | Mutation                                         | Phylogenetics | Furin cleavage | FIPV       |
| KP143507.1 | UK      | 2013            | Mutation                                         | Phylogenetics | Furin cleavage | FIPV       |
| KF530123.1 | NLD     | 2010            | Mutation                                         | Phylogenetics | /              | FCoV       |
| JN634064.1 | USA     | 2011            | Mutation                                         | Phylogenetics | /              | FCoV       |



|            |              |       |          |               |                |      |
|------------|--------------|-------|----------|---------------|----------------|------|
| JN183883.1 | NLD          | 2010  | Mutation | Phylogenetics | Furin cleavage | FCoV |
| JN183882.1 | NLD          | 2010  | Mutation | Phylogenetics | Furin cleavage | FCoV |
| HQ392472.1 | NLD          | 2010  | Mutation | Phylogenetics | Furin cleavage | FCoV |
| HQ392471.1 | NLD          | 2007  | Mutation |               | Furin cleavage | FCoV |
| HQ392470.1 | NLD          | 2007  | Mutation | Phylogenetics | Furin cleavage | FCoV |
| HQ392469.1 | NLD          | 2008  | Mutation | Phylogenetics | Furin cleavage | FCoV |
| HQ012372.1 | NLD          | 2007  | Mutation | Phylogenetics | Furin cleavage | FIPV |
| HQ012371.1 | NLD          | 2008  | Mutation | Phylogenetics | Furin cleavage | FCoV |
| HQ012370.1 | NLD          | 2008  | Mutation | Phylogenetics | Furin cleavage | FIPV |
| HQ012369.1 | NLD          | 2007  | Mutation | Phylogenetics | Furin cleavage | FIPV |
| HQ012368.1 | NLD          | 2007  | Mutation | Phylogenetics | /              | FCoV |
| HQ012367.1 | NLD          | 2007  | Mutation | Phylogenetics | Furin cleavage | FIPV |
| GU553362.1 | NLD          | 2007  | /        | Phylogenetics | Furin cleavage | FCoV |
| GU553361.1 | NLD          | 2007  | Mutation | Phylogenetics | Furin cleavage | FCoV |
| GQ152141.1 | China/Taiwan | 2007  | Mutation | Phylogenetics | /              | FCoV |
| FJ938062.1 | NLD          | 2007  | Mutation | Phylogenetics | Furin cleavage | FIPV |
| FJ938061.1 | USA          | 1998  | Mutation | Phylogenetics | Furin cleavage | FIPV |
| FJ938060.1 | USA          | 1993  | Mutation | Phylogenetics | Furin cleavage | FCoV |
| FJ938059.1 | NLD          | 2007  | Mutation | Phylogenetics | Furin cleavage | FCoV |
| FJ938058.1 | NLD          | 2007  | Mutation | Phylogenetics | Furin cleavage | FIPV |
| FJ938057.1 | NLD          | 2007  | /        | Phylogenetics | Furin cleavage | FIPV |
| FJ938056.1 | NLD          | 2007  | Mutation | Phylogenetics | Furin cleavage | FIPV |
| FJ938055.1 | NLD          | 2007  | Mutation | Phylogenetics | Furin cleavage | FIPV |
| FJ938054.1 | NLD          | 2007  | Mutation | Phylogenetics | Furin cleavage | FIPV |
| FJ938053.1 | NLD          | 2007  | Mutation | Phylogenetics | Furin cleavage | FCoV |
| FJ938052.1 | NLD          | 2007  | Mutation | Phylogenetics | Furin cleavage | FCoV |
| FJ938051.1 | USA          | 2002  | Mutation | Phylogenetics | Furin cleavage | FCoV |
| EU186072.1 | USA          | 1970s | Mutation | Phylogenetics | Furin cleavage | FIPV |
| DQ848678.1 | UK           | 2006  | Mutation | Phylogenetics | Furin cleavage | FIPV |
| DQ286389.1 | USA          | 2005  | Mutation | Phylogenetics | /              | FIPV |
| DQ010921.1 | USA          | 2005  | /        | Phylogenetics | /              | FIPV |
| AY994055.1 | USA          | 2008  | Mutation | /             | /              | FIPV |
